# Supplementary material for: A Prospective Cohort Study Investigating the Impact of Neutering Bitches Prepubertally or Post-Pubertally on Physical Development
Source: MDPI journal article supplement (doi:10.3390/ani13091431), 2023-04-22
Supplement: s1 [file s1]

**Table S1 results from binary logistic regression for body condition score at (A) six and (B) 17 months of age**

A. The odds ratio (OR) and confidence intervals for each predictor variable category for the influence on body condition score at six months of age in comparison to the reference category veterinary practice (VP) (\*).

| Variable         | Value  | S.E.  | Wald Chi-Square | Pr > Chi <sup>2</sup> | OR     | OR Lower bound (96%) | OR Upper bound (96%) |
|------------------|--------|-------|-----------------|-----------------------|--------|----------------------|----------------------|
| Intercept        | -9.045 | 1.800 | 25.258          | < 0.0001              |        |                      |                      |
| Body weight (Kg) | 0.374  | 0.082 | 20.955          | < 0.0001              | 1.453  | 1.229                | 1.718                |
| Compared to VP1  |        |       |                 |                       |        |                      |                      |
| *VP1             | 0.000  | 0.000 |                 |                       |        |                      |                      |
| VP2              | 3.167  | 0.550 | 33.185          | < 0.0001              | 23.737 | 7.675                | 73.416               |
| VP3              | -0.892 | 0.420 | 4.499           | 0.034                 | 0.410  | 0.173                | 0.972                |
| VP4              | -1.276 | 0.529 | 5.817           | 0.016                 | 0.279  | 0.094                | 0.827                |
| Compared to VP2  |        |       |                 |                       |        |                      |                      |
| VP1              | -3.167 | 0.550 | 33.185          | < 0.0001              | 0.042  | 0.014                | 0.130                |
| *VP2             | 0.000  | 0.000 |                 |                       |        |                      |                      |
| VP3              | -4.059 | 0.550 | 54.529          | < 0.0001              | 0.017  | 0.006                | 0.053                |
| VP4              | -4.443 | 0.644 | 47.582          | < 0.0001              | 0.012  | 0.003                | 0.044                |

B. The odds ratio (OR) and confidence intervals for each predictor variable category for the influence on body condition score at 17 months of age in comparison to the reference category veterinary practice (VP) (\*).

| Variable         | Value  | S.E.  | Wald Chi-Square | Pr > Chi <sup>2</sup> | OR     | OR Lower bound (96%) | OR Upper bound (96%) |
|------------------|--------|-------|-----------------|-----------------------|--------|----------------------|----------------------|
| Intercept        | 7.685  | 2.465 | 9.716           | 0.002                 |        |                      |                      |
| Body weight (Kg) | -0.215 | 0.083 | 6.671           | 0.010                 | 0.807  | 0.680                | 0.957                |
| Compared to VP2  |        |       |                 |                       |        |                      |                      |
| VP1              | 1.030  | 0.500 | 4.247           | 0.039                 | 2.800  | 1.004                | 7.813                |
| *VP2             | 0.000  | 0.000 |                 |                       |        |                      |                      |
| VP3              | 1.505  | 0.483 | 9.701           | 0.002                 | 4.502  | 1.669                | 12.142               |
| VP4              | 3.376  | 1.067 | 10.016          | 0.002                 | 29.256 | 3.271                | 261.640              |
| Other            | 0.257  | 0.630 | 0.166           | 0.684                 | 1.293  | 0.355                | 4.711                |
| Compared to V4   |        |       |                 |                       |        |                      |                      |
| V4               | -2.346 | 1.079 | 4.729           | 0.030                 | 0.096  | 0.010                | 0.878                |

|       |        |       |        |       |       |       |       |
|-------|--------|-------|--------|-------|-------|-------|-------|
| VP1   |        |       |        |       |       |       |       |
| VP2   | -3.376 | 1.067 | 10.016 | 0.002 | 0.034 | 0.004 | 0.306 |
| VP3   | -1.872 | 1.075 | 3.032  | 0.082 | 0.154 | 0.017 | 1.399 |
| *VP4  | 0.000  | 0.000 |        |       |       |       |       |
| Other | -3.119 | 1.152 | 7.332  | 0.007 | 0.044 | 0.004 | 0.471 |
